# Supplementary material for: Towards quantitative viromics for both double-stranded and single-stranded DNA viruses
Source: PeerJ journal article supplement (doi:10.7717/peerj.2777), 2016-12-08

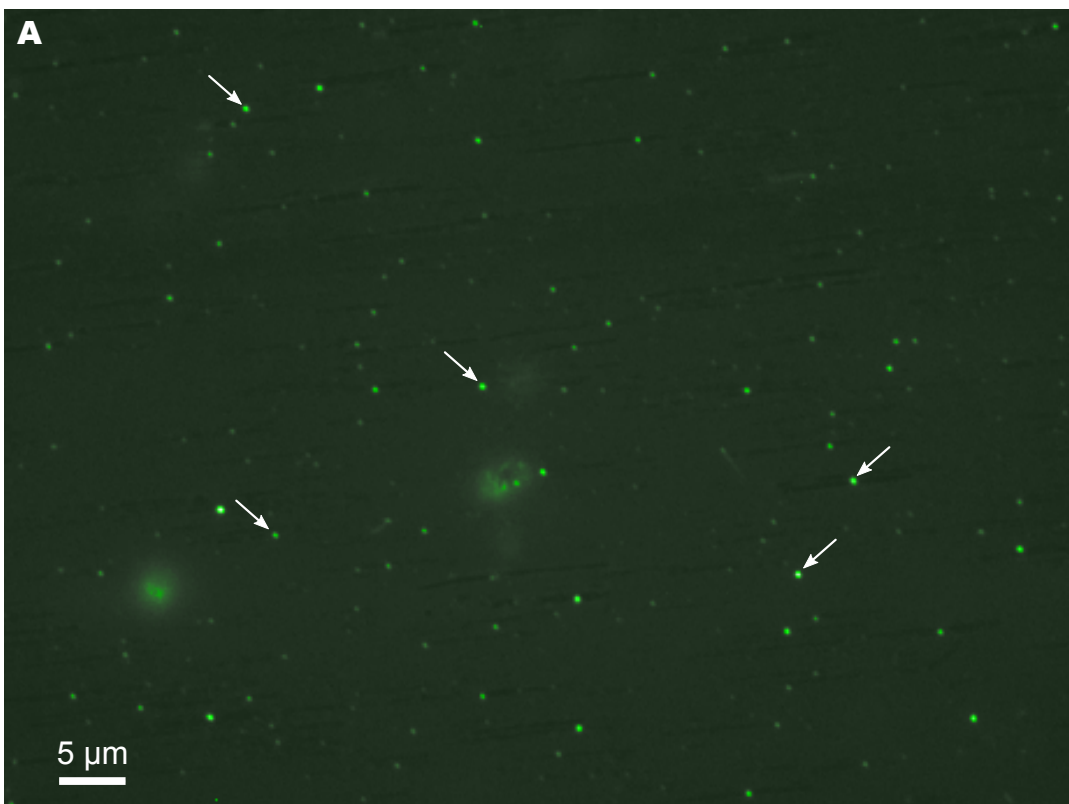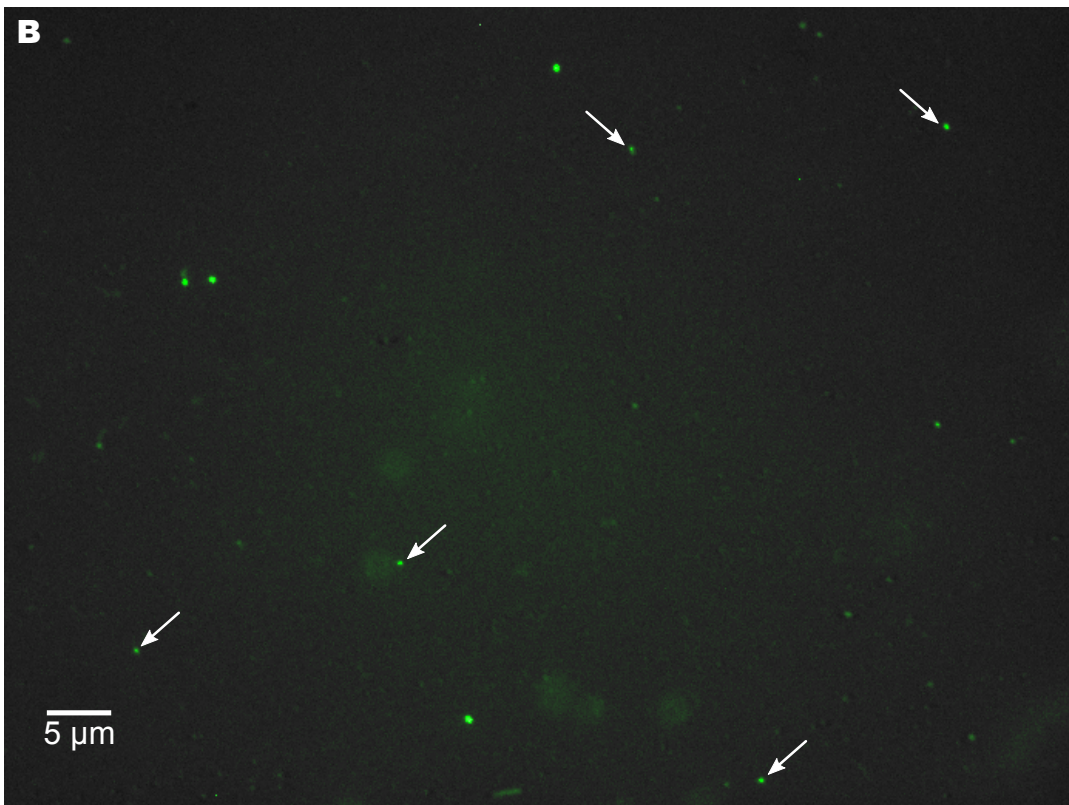

Supplement: Figure_S1_SYBR.pdf [file Figure_S1_SYBR.pdf]
