# Supplementary material for: Towards quantitative viromics for both double-stranded and single-stranded DNA viruses
Source: PeerJ journal article supplement (doi:10.7717/peerj.2777), 2016-12-08

## Variation of dsDNA genomes relative abundance

within sample, between dsDNA genomes

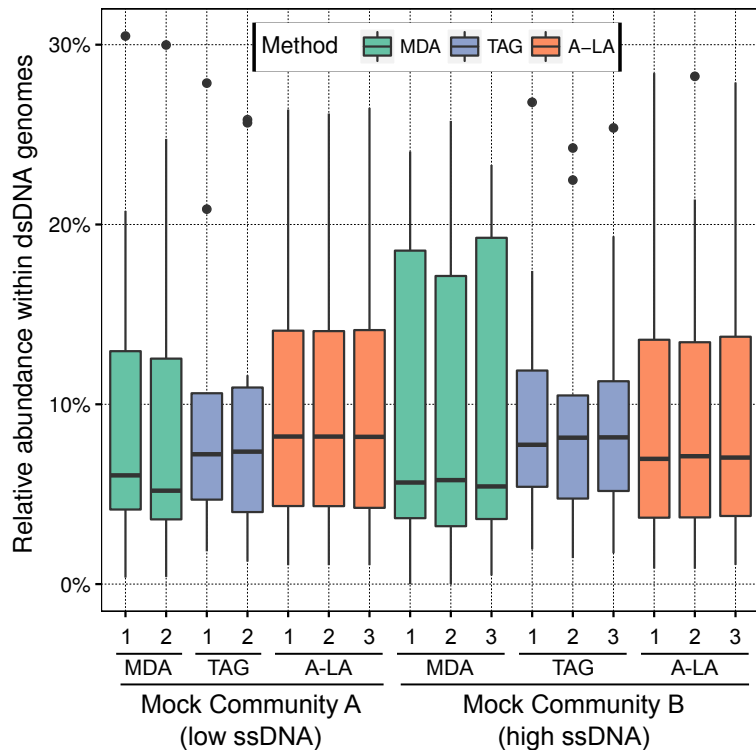

for each dsDNA genome, across samples

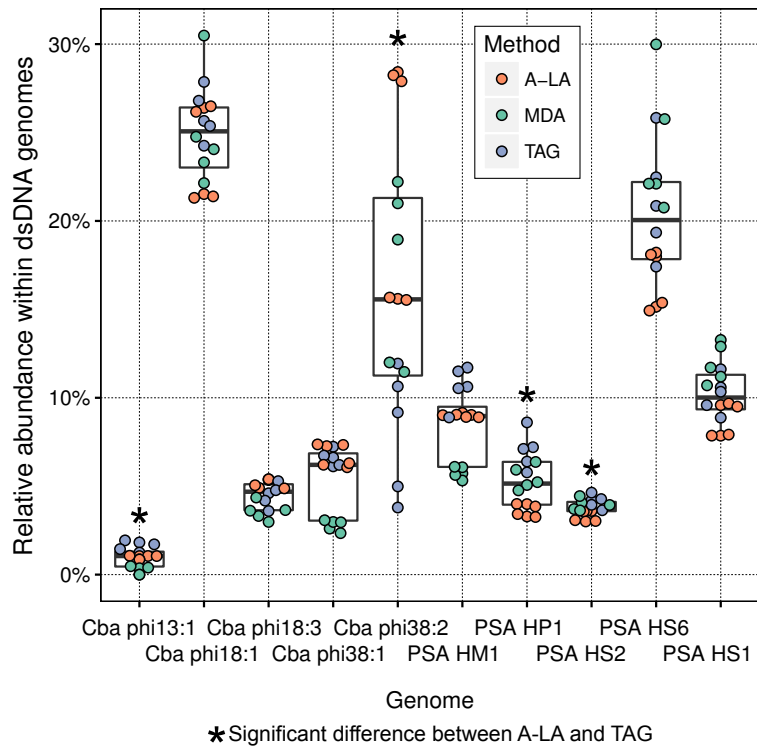

Supplement: Figure_S2_within_dsDNA.pdf [file Figure_S2_within_dsDNA.pdf]
