# Supplementary material for: Towards quantitative viromics for both double-stranded and single-stranded DNA viruses
Source: PeerJ journal article supplement (doi:10.7717/peerj.2777), 2016-12-08

# Coverage Coefficient of Variation (CV) of dsDNA genomes across viromes

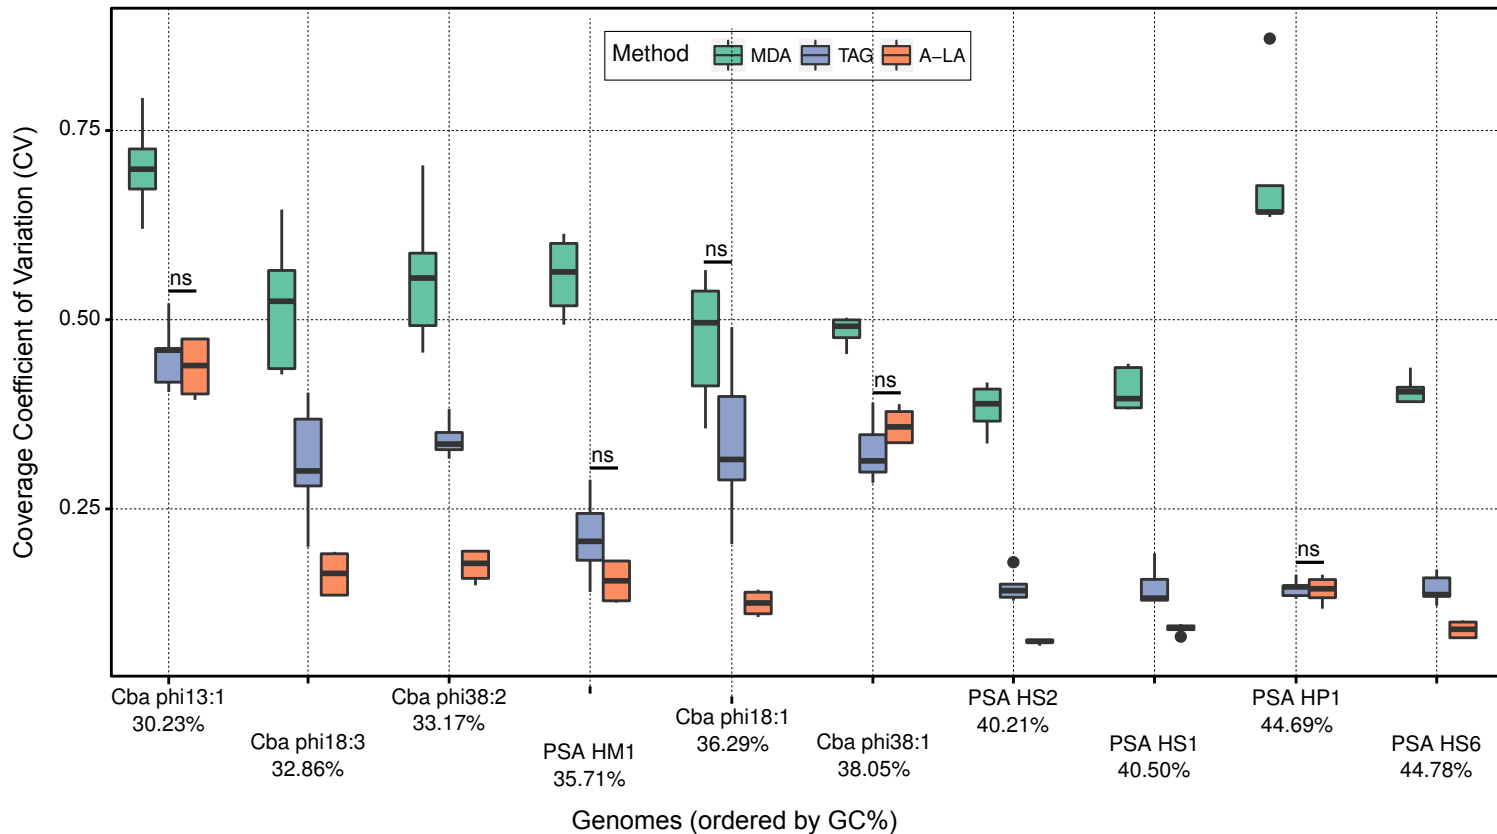

Supplement: Figure_S3_GC_pcent_link_to_coverage_CV.pdf [file Figure_S3_GC_pcent_link_to_coverage_CV.pdf]
